# Supplementary material for: Exploring aliphatic nitro azides for plasticizers: a combined DFT and MD investigation
Source: Royal Society of Chemistry journal article supplement (doi:10.1039/c4ra15302b), 2015-01-01
Supplement: c4ra15302b1.pdf [file c4ra15302b1.pdf]

### Coordinates (in Å) of the optimized geometries of M1-M8

| M1   |           |           |           | M2   |           |           |           |
|------|-----------|-----------|-----------|------|-----------|-----------|-----------|
| Atom | X         | Y         | Z         | Atom | X         | Y         | Z         |
| C    | 0.292037  | 1.014929  | 0.152394  | C    | 0.514468  | 0.146881  | 0.585178  |
| N    | -0.948120 | 0.827799  | -0.530926 | C    | -0.394341 | -0.704403 | -0.309087 |
| N    | -1.766830 | 0.053950  | -0.006760 | N    | 1.922584  | 0.164158  | 0.032722  |
| N    | -2.615183 | -0.603975 | 0.337079  | O    | 2.442296  | -0.920743 | -0.183007 |
| N    | 1.260582  | -0.188632 | 0.000422  | O    | 2.440088  | 1.251902  | -0.160910 |
| O    | 2.435903  | 0.059984  | 0.198264  | N    | -1.737298 | -0.803732 | 0.288316  |
| O    | 0.777982  | -1.274178 | -0.255651 | N    | -2.540403 | 0.080834  | -0.017765 |
| H    | 0.816043  | 1.856364  | -0.289460 | N    | -3.377127 | 0.816740  | -0.224235 |
| H    | 0.207506  | 1.143624  | 1.235500  | H    | 0.584796  | -0.288939 | 1.582252  |
|      |           |           |           | H    | 0.197476  | 1.185476  | 0.645816  |
|      |           |           |           | H    | -0.435042 | -0.289429 | -1.321327 |
|      |           |           |           | H    | -0.001352 | -1.717254 | -0.365223 |

  

| M3   |           |           |           | M4   |           |           |           |
|------|-----------|-----------|-----------|------|-----------|-----------|-----------|
| Atom | X         | Y         | Z         | Atom | X         | Y         | Z         |
| C    | 1.282180  | -0.609961 | 0.506004  | C    | -1.728796 | 0.424935  | 0.579073  |
| C    | -0.008399 | -0.215914 | -0.208363 | C    | -0.670502 | -0.350467 | -0.201707 |
| C    | -1.192781 | -1.042808 | 0.308324  | C    | 0.729060  | -0.126923 | 0.384654  |
| N    | -2.440803 | -0.749019 | -0.424505 | C    | 1.798401  | -0.908122 | -0.386544 |
| N    | -3.017752 | 0.295039  | -0.117484 | N    | -3.107651 | 0.173039  | 0.004954  |
| N    | -3.649606 | 1.217068  | 0.075341  | O    | -3.727654 | 1.134450  | -0.422577 |
| N    | 2.440218  | 0.235818  | 0.017465  | O    | -3.503498 | -0.982947 | 0.004106  |
| O    | 3.391450  | -0.343969 | -0.481910 | N    | 3.146827  | -0.766525 | 0.205561  |
| O    | 2.338546  | 1.444777  | 0.157630  | N    | 3.726775  | 0.296204  | -0.012401 |
| H    | 1.571388  | -1.642688 | 0.322078  | N    | 4.367817  | 1.223512  | -0.146139 |
| H    | 1.223149  | -0.422294 | 1.579983  | H    | -1.581940 | 1.502105  | 0.536646  |
| H    | -0.193049 | 0.848963  | -0.048753 | H    | -1.782754 | 0.092598  | 1.617302  |
| H    | 0.098577  | -0.378817 | -1.284310 | H    | -0.925669 | -1.412939 | -0.179758 |
| H    | -1.014949 | -2.106971 | 0.149255  | H    | -0.693734 | -0.031406 | -1.249297 |
| H    | -1.335480 | -0.884903 | 1.384468  | H    | 0.976251  | 0.940706  | 0.365883  |
|      |           |           |           | H    | 0.754123  | -0.441710 | 1.432964  |
|      |           |           |           | H    | 1.583700  | -1.976579 | -0.352254 |
|      |           |           |           | H    | 1.813879  | -0.604949 | -1.440394 |

  

| M5   |           |           |           | M6   |           |           |           |
|------|-----------|-----------|-----------|------|-----------|-----------|-----------|
| Atom | X         | Y         | Z         | Atom | X         | Y         | Z         |
| C    | 2.486840  | -0.500277 | 0.501167  | C    | 3.011427  | 0.540854  | 0.555303  |
| C    | 1.205347  | 0.013265  | -0.152081 | C    | 1.879107  | -0.197670 | -0.155677 |
| C    | -0.029315 | -0.731339 | 0.371239  | C    | 0.511501  | 0.164493  | 0.436103  |
| C    | -1.327888 | -0.240825 | -0.280359 | C    | -0.644809 | -0.561148 | -0.262449 |

|   |           |           |           |   |           |           |           |
|---|-----------|-----------|-----------|---|-----------|-----------|-----------|
| C | -2.557042 | -0.989585 | 0.242968  | C | -2.015323 | -0.205622 | 0.325349  |
| N | 3.689201  | 0.262288  | -0.013130 | C | -3.158260 | -0.943449 | -0.377206 |
| O | 4.535852  | -0.363582 | -0.632714 | N | -4.484704 | -0.660570 | 0.219521  |
| O | 3.724136  | 1.461348  | 0.219608  | N | -4.962501 | 0.446548  | -0.018788 |
| N | -3.811094 | -0.583370 | -0.431602 | N | -5.512225 | 1.428816  | -0.170478 |
| N | -4.276066 | 0.506687  | -0.103447 | N | 4.350443  | 0.153327  | -0.034381 |
| N | -4.809291 | 1.484701  | 0.116737  | O | 4.993627  | 1.022430  | -0.603412 |
| H | 2.682525  | -1.547556 | 0.280238  | O | 4.691862  | -1.013735 | 0.088065  |
| H | 2.479259  | -0.336149 | 1.580112  | H | 2.941595  | 1.621477  | 0.449216  |
| H | 1.113089  | 1.084092  | 0.045827  | H | 3.067285  | 0.266149  | 1.609922  |
| H | 1.281340  | -0.111945 | -1.237328 | H | 2.053866  | -1.273469 | -0.072840 |
| H | 0.084805  | -1.806836 | 0.188475  | H | 1.901251  | 0.054519  | -1.221347 |
| H | -0.094969 | -0.606725 | 1.459163  | H | 0.354041  | 1.247586  | 0.365575  |
| H | -1.448553 | 0.832599  | -0.094513 | H | 0.499334  | -0.080651 | 1.505155  |
| H | -1.274476 | -0.369931 | -1.366168 | H | -0.486580 | -1.644194 | -0.191002 |
| H | -2.463978 | -2.057747 | 0.043546  | H | -0.629654 | -0.318263 | -1.332118 |
| H | -2.655857 | -0.861505 | 1.327988  | H | -2.179264 | 0.875681  | 0.246599  |
|   |           |           |           | H | -2.042054 | -0.451960 | 1.392031  |
|   |           |           |           | H | -3.030991 | -2.022068 | -0.279965 |
|   |           |           |           | H | -3.171690 | -0.705959 | -1.448114 |

| M7   |           |           |           | M8   |           |           |           |
|------|-----------|-----------|-----------|------|-----------|-----------|-----------|
| Atom | X         | Y         | Z         | Atom | X         | Y         | Z         |
| C    | 3.736923  | -0.455483 | 0.475114  | C    | 4.298732  | 0.606632  | 0.506165  |
| C    | 2.461648  | 0.123831  | -0.134271 | C    | 3.128037  | -0.129730 | -0.142503 |
| C    | 1.211626  | -0.599725 | 0.381581  | C    | 1.783170  | 0.331072  | 0.432814  |
| C    | -0.084481 | -0.044581 | -0.220490 | C    | 0.588690  | -0.388255 | -0.204762 |
| C    | -1.342009 | -0.756957 | 0.291011  | C    | -0.761977 | 0.060278  | 0.364166  |
| C    | -2.635673 | -0.203410 | -0.317930 | C    | -1.957688 | -0.657890 | -0.272321 |
| C    | -3.880031 | -0.929522 | 0.199764  | C    | -3.305670 | -0.208051 | 0.303416  |
| N    | -5.134569 | -0.458904 | -0.433696 | C    | -4.487267 | -0.937364 | -0.340756 |
| N    | -5.543847 | 0.643469  | -0.076370 | N    | -5.794920 | -0.564218 | 0.249958  |
| N    | -6.028108 | 1.639980  | 0.174047  | N    | -6.222679 | 0.551412  | -0.036649 |
| N    | 4.953729  | 0.286516  | -0.034056 | N    | -6.727164 | 1.550804  | -0.229867 |
| O    | 5.748664  | -0.332241 | -0.725711 | N    | 5.612801  | 0.122504  | -0.067231 |
| O    | 5.050607  | 1.465819  | 0.271643  | O    | 6.274804  | 0.915069  | -0.720609 |
| H    | 3.893034  | -1.499241 | 0.210401  | O    | 5.916289  | -1.041214 | 0.150664  |
| H    | 3.753351  | -0.332095 | 1.559200  | H    | 4.272586  | 1.679309  | 0.325490  |
| H    | 2.408158  | 1.188705  | 0.106540  | H    | 4.354806  | 0.402739  | 1.576614  |
| H    | 2.516078  | 0.039198  | -1.224910 | H    | 3.257220  | -1.203884 | 0.013676  |
| H    | 1.286233  | -1.670533 | 0.155397  | H    | 3.149417  | 0.046877  | -1.223279 |
| H    | 1.168423  | -0.517320 | 1.474750  | H    | 1.672837  | 1.413085  | 0.289697  |
| H    | -0.157463 | 1.026719  | 0.002995  | H    | 1.772492  | 0.160626  | 1.516576  |

---

|   |           |           |           |   |           |           |           |
|---|-----------|-----------|-----------|---|-----------|-----------|-----------|
| H | -0.040656 | -0.127119 | -1.313315 | H | 0.701322  | -1.470380 | -0.063689 |
| H | -1.266082 | -1.828973 | 0.069333  | H | 0.601134  | -0.218325 | -1.288611 |
| H | -1.386142 | -0.672232 | 1.384160  | H | -0.873515 | 1.142802  | 0.223570  |
| H | -2.719120 | 0.866258  | -0.092139 | H | -0.773960 | -0.109615 | 1.448076  |
| H | -2.605397 | -0.293828 | -1.408818 | H | -1.845713 | -1.740443 | -0.132087 |
| H | -3.827154 | -1.992147 | -0.039606 | H | -1.946651 | -0.486948 | -1.356200 |
| H | -3.955869 | -0.838360 | 1.290395  | H | -3.423635 | 0.872530  | 0.158889  |
|   |           |           |           | H | -3.330156 | -0.385903 | 1.383739  |
|   |           |           |           | H | -4.404383 | -2.012663 | -0.179779 |
|   |           |           |           | H | -4.504981 | -0.764308 | -1.423915 |

---
